# Supplementary material
Source: PubMed Central journal article supplement (PMC3901047)
Supplement: NIHMS530616-supplement-439_2013_1368_MOESM2_ESM.pdf [file NIHMS530616-supplement-439_2013_1368_MOESM2_ESM.pdf]

| # | Gene      | Primer Sequence (5' to 3')     |
|---|-----------|--------------------------------|
| 1 | ADD3_F    | TTG AGT TTG AAG GGC TTA TGA GG |
| 2 | ADD3_R    | TTG CTG GGA TTT CCA CAT CAC    |
| 3 | XPNPEP1_F | TCA TTG ATG GTG ACC GCA TAG    |
| 4 | XPNPEP1_R | CTC GCT CAG GAT GGA CTT GTA G  |

**Supplementary Table 1.** qPCR Primer Design.

The sets of primers designed to test for *XPNPEP1* and *ADD3* expression are listed above.
