# Supplementary material
Source: PubMed Central journal article supplement (PMC3901047)
Supplement: NIHMS530616-supplement-439_2013_1368_MOESM3_ESM.pdf [file NIHMS530616-supplement-439_2013_1368_MOESM3_ESM.pdf]

| Exon | Forward Sequence                | Reverse Sequence                | Annealing Temperature | MgCl <sub>2</sub> Concentration |
|------|---------------------------------|---------------------------------|-----------------------|---------------------------------|
| 1    | TGC ACC TGT TAA CTC TGA GGG CAA | AAG ACT GGA AGC AAC TGG TCA C   | 60°C                  | 1.0 mM                          |
| 2    | TCT TGC TGC TTC TTG CAG TGC T   | ACT CCT GGG CTC AAG CAT TTC T   | 55°C                  | 1.5 mM                          |
| 3    | CCA GTG GTG TGA GCC TTT GAT A   | TGA CCT CCT CTA TCT TCC TTG CCT | 60°C                  | 1.0 mM                          |
| 4    | TGA CCC TAA ATA ACC TTA GAG CCC | AGT GCT TGG ATT ACA GGC GTG A   | 55°C                  | 1.5 mM                          |
| 5    | AAT TGC AGC AGA GGC CCA CAA A   | TTG CAG CCC ACT TCC CAC TTT A   | 60°C                  | 1.5 mM                          |
| 6    | TGG GCT GCA ATG GTG AAA CAC A   | TCC AAG TGC AAC CAC ACC ATG A   | 55°C                  | 1.0 mM                          |
| 7    | TAA AGT GGG AAG TGG GCT GCA A   | AGG CCC TTA GAT TGT GTG TGA G   | 55°C                  | 1.0 mM                          |
| 8    | GGC AGC AGA ATT CCG TGG CTT AAA | TGA TTG TGT CAC GGC ACT CCA A   | 60°C                  | 1.0 mM                          |
| 9    | ATG TGG TGT TTG GAA GGA TGC C   | AGT GGA CAA GAA CTG GGC TCA A   | 60°C                  | 1.5 mM                          |
| 10   | TGC CAT CTT CAT CTG ACT GCT G   | AGC AGG GTT CTC TAA CGC AGA A   | 60°C                  | 1.0 mM                          |
| 11   | TTC TGC GTT AGA GAA CCC TGC T   | ACA GAA AGT TGC TGC ACC TGG A   | 60°C                  | 1.5 mM                          |
| 12   | AGG GCA TCA ATC TTA CAA GAG CA  | GCT TTC TAT CAT CCA ACG TGA GG  | 55°C                  | 1.5 mM                          |
| 13   | CAT GCT CAG CTC ACT GCT GAA     | CTT AAG AAC TGC GGG TTG CCA     | 50°C                  | 1.5 mM                          |
| 14   | CTC CCA ATC AGC AGC ATG AAA     | TAC TTC ATG AGG GCA GAG CTA A   | 55°C                  | 1.5 mM                          |

**Supplementary Table 2.** PCR primer design for sequencing of *ADD3*.

The forward and reverse primer sets used to sequence the 14 coding exons of *ADD3* are listed above. The optimal annealing temperature and MgCl<sub>2</sub> concentrations are also included.
